# Supplementary material for: Identifying Gaps in Caries Prevention and Management: A Multi-Institutional Mixed-Methods Study
Source: Research Square preprint supplement (doi:10.21203/rs.3.rs-7963779/v1), 2025-12-22
Supplement: Supplementary file 1 [file f996d189dc42621381d66b58.docx]

**Appendix A: Interview guide questions for providers, patients, and staff**

| **Providers** | **Staff** | **Patients/Parents of patients** |
| --- | --- | --- |
| **Section 1: Introduction/Getting to know you**  Tell us about yourself and about your role at your institution. | **Section 1: Introduction/Getting to know you**  To get to know you a little bit, can you tell us how long you have been working at…? How many hours per week? | **Section 1: Introduction/Getting to know you**  Tell us about yourself. What do you do for a living, and who’s in your immediate family? What’s a favorite activity you like to do as a family? |
| **Section 2: Caries Risk Assessment**  a. How important do you think it is to routinely conduct caries risk assessment for your patients?  b. How do you go about assessing the risk of your patients?  c. What do you think of the caries risk assessment tool that is available for your use at your [institution]?  d. How do you in general communicate the risk level to your patient? | **Section 2. Overview of roles/responsibilities and workflow**  a. What are your role/responsibilities on the dental team? | **Section 2: Oral health care practices at home; general understanding of oral health**  a. What is your child’s routine around oral care?  b. How frequently do you change their toothbrush (or head)?  c. What challenges do you have in helping your child develop good oral care practices?  d. What would help your child get you more motivated in brushing & flossing (if over 12 years)?  e. Where do you learn about good oral health practices?  f. Tell me a little about your child’s diet – let’s start with what they typically eat and drink during the day and how often.  g. Has your child had cavities? |
| **Section 3: Caries Management and Prevention**  a. How do you use the risk assessment to plan or guide the treatment for your patients  b. Your [institution] has recommendations for preventative care and treatments based on the patient’s risk levels. How helpful are these recommendations? What parts of the recommendations/protocol do you have the most confidence in and why? What parts of the recommendations/protocol do you have the least confidence in and why?  c. For moderate, high, or extreme risk patients, we noticed that fluoride varnish is not applied as often; what are your thoughts on this?  d. For elevated risk patients with retentive pits and fissures, we noticed that not every patient who appeared eligible for SDF received it. what are your thoughts on this?  e. For high or extreme risk patients, we noticed that antimicrobials like Chlorhexidine may not be prescribed/dispensed for these patients. what are your thoughts on this?  f. For elevated risk patients with retentive pits and fissures, we noticed that sealants are not always applied. What are your thoughts on this?  g. What other barriers have you faced that have made it difficult to implement the caries prevention and management protocols? | **Section 3: Quality**  a. What are some examples of things, in your opinion, that the organization does well relating to the quality of care patients receive?  b. What are some challenges you have noticed relating to the quality of care patients receive?  c. Tell me more about how your role may impact the quality of care a patient receives.  d. What ideas do you have to improve the quality of care provided for patients? | **Section 3: Experience scheduling appointment; ease of access to dental care** a. How long has it been since his/her last visit? What was the purpose of your child’s most recent visit to the dentist?  b. Was it easy to get an appointment?  c. Was the length of time between when you scheduled the appointment to the actual date of the appointment reasonable?  d. Were you able to get in when you wanted? What would make it easier for you to get in to see/your child’s dentist?  e. What challenges do you have attending a dental appointment?  Next, I'm going to ask you questions about your child’s experience with the dental team at your most recent dental visit |
| **Section 4: Patient Instructions**  a. What ideas do you have to improve how information can be provided to patients? | **Section 4. Experience scheduling appointments; ease of access to dental care; follow-up (*depends on role*)**  a. How easy or difficult is it for patients to schedule appointments at your clinic?  b. Why do patients tend to miss appointments in your clinic?  c. What logistical/workflow challenges do you experience in helping patients get scheduled?  d. What ideas do you have to improve how patients can schedule their dental appointments? | **Section 4: Child’s In-office experience**  a. What information did the dental team (dentist, hygienist, assistant) talk to you about regarding your child’s risk for cavities?  b. What information or suggestions did the dental team have for preventing dental caries?  c. Did they recommend any in-office treatments?  d. Did they recommend anything you can do at home?  e. How frequently did they recommend that your child/children have checkups?  f. What is hard about doing what the dentist or dental team recommends to keep your child from getting cavities?  g. How did the dental team communicate this information to you?  h. What would have been a better way to get the information?  i. During your dental visit, what treatment was provided to your child?  j. How clear are the next steps in your child’s treatment?  k. What additional information would you have liked to have received at your dental visit?  l. How would you go about getting clarification about what’s happening, if something wasn’t clear?  m. Overall, how satisfied were you with the visit? n. Can you think of anything that could have made the dental visit better? |
| **Section 5: Quality measures**  a. What ideas do you have for improving how well the caries prevention and management protocol is followed? | **Section 5. This question is only applicable to dental assistants/care advocates**  a. Caries Risk Assessment  How are caries risk assessments conducted at the clinic? What works well? What can be improved? Who communicates the risk level to your patient? How is this done? What works well? What can be improved?  b. Caries Management and Prevention  How do the providers use the risk assessment to plan or guide the treatment for the patients?  How helpful are the preventative care and treatment recommendations provided to the patients?  What barriers do you or the providers face in implementing or communicating the caries prevention and management protocols to the patients?  c. Are there times that you see high-risk patients not being recommended or not getting sealants or fluoride and any thoughts on why? What could we do to improve that? | **Section 5: Concluding section**a. Is there anything you want to add to what we’ve talked about today?b. Do you have any questions for me about what we’ve talked about today? |
| **Section 6: Concluding section**  We really appreciate your feedback. Before we end, do you have any other comments or suggestions that you would like to mention? | **Section 6. Workarounds and shortcuts – where they happen**  a. Are there situations you feel the need to use shortcuts or workarounds in your workflow to get things done?  b. Can you share any examples and why you use these? |  |
|  | **Section 7. Challenges and opportunities/solutions**  a. What types of questions do patients ask you?  b. What support do you need to better communicate with patients?  c. What other improvement ideas do you have for the clinic? |  |
|  | **Section 8: Concluding section**  We really appreciate your feedback. Is there anything you want to add to what we’ve talked about today?  Do you have any questions for me about what we’ve talked about today? |  |
